# Supplementary material for: Genetic diversity in the plasticity zone and the presence of the chlamydial plasmid differentiates Chlamydia pecorum strains from pigs, sheep, cattle, and koalas
Source: PubMed Central journal article supplement (PMC4632680; doi:10.1186/s12864-015-2053-8), 2015-11-04
Supplement: 12864_2015_2053_MOESM4_ESM.pdf [file 12864_2015_2053_MOESM4_ESM.pdf]

Table S3. Characteristics of the polymorphic chromosomal genes under positive selection analysed in the present study from three porcine *C. pecorum* L1, L17, and L71 strains

| Annotation and sequence length (bp)                | Locus tag in L1 | Predicted function/product*                                             | Δnt in protein coding region* | No. of non-synonymous substitutions | No. of synonymous substitutions | dn/ds ratio <sup>^</sup> | Base coordinates in L1 |
|----------------------------------------------------|-----------------|-------------------------------------------------------------------------|-------------------------------|-------------------------------------|---------------------------------|--------------------------|------------------------|
| <b>Hypothetical protein</b><br>(1912 bp)           | cpL1_0291       | <i>C. pneumoniae</i> 76kDa orthologue/wall surface anchor SrpA1 protein | 159                           | 87                                  | 72                              | 1.11                     | 327 – 332kbp           |
| <b>Conserved hypothetical protein</b><br>(1089 bp) | cpL1_0338       | Chlamydial T3SS effector protein/ <i>C. psittaci</i> SINC orthologue    | 174                           | 107                                 | 67                              | 1.30                     | 381.5 – 383.5kbp       |
| <b>Conserved hypothetical protein</b><br>(2406 bp) | cpL1_0441       | T3SS effector <i>Tarp</i> homologue                                     | 105                           | 56                                  | 49                              | 1.11                     | 475.5 – 478.5kbp       |
| <b>Conserved hypothetical protein</b><br>(1683 bp) | cpL1_0538       | Chlamydial conserved protein                                            | 517                           | 324                                 | 193                             | 1.88                     | 587 – 591.5kbp         |
| <b>Conserved hypothetical protein</b><br>(2246 bp) | cpL1_0539       | Chlamydial conserved protein/transcriptional regulator                  | 575                           | 385                                 | 190                             | 1.33                     | 587 – 591.5kbp         |
| <b>Conserved hypothetical protein</b><br>(1460 bp) | cpL1_0645       | Chlamydial conserved protein                                            | 61                            | 39                                  | 22                              | 1.66                     | 725 – 729.5kbp         |
| <b>Conserved hypothetical protein</b><br>(1794 bp) | cpL1_0646       | Chlamydial conserved protein                                            | 101                           | 75                                  | 26                              | 1.56                     | 725 – 729.5kbp         |
| <b>Macro domain protein</b><br>(1140 bp)           | cpL1_0675       | ADP-ribose binding domain                                               | 189                           | 122                                 | 67                              | 1.72                     | 756.5 – 758.5kbp       |

\*: function predicted based on blastn and tblastx comparison; \*: Δnt (No. of polymorphic sites), excluding gaps in the alignment; ^: ratio of the average number of non-synonymous substitutions per non-synonymous site and synonymous substitutions per synonymous site (Jukes - Cantor corrected), estimated excluding gaps in the alignment.
